# Supplementary material for: Method for the Detection of the Cleaved Form of Shiga Toxin 2a Added to Normal Human Serum
Source: PubMed Central journal article supplement (PMC7911550; doi:10.3390/toxins13020094), 2021-01-26
Supplement: toxins-13-00094-s001.pdf [file toxins-13-00094-s001.pdf]

## Supplementary Materials: Method for the Detection of the Cleaved Form of Shiga Toxin 2a Added to Normal Human Serum

Lucrezia Rocchetti, Beatrice Munari, Elisa Varrone, Elisa Porcellini, Dorothea Orth-Höller, Reinhard Würzner, Domenica Carnicelli and Maurizio Brigotti

**Table 1.** IC<sub>50</sub> of Stx2a on the rabbit reticulocyte-derived fractionated cell-free translation system: equations and statistical analysis of the straight lines.

| Additions                                     | IC <sub>50</sub> (nM) | r <sup>2</sup> | Equation              |
|-----------------------------------------------|-----------------------|----------------|-----------------------|
| Stx2a                                         | 3.680                 | 0.9834         | $y = -67.31x + 88.09$ |
| Stx2a + DTT                                   | 1.511                 | 0.9714         | $y = -74.79x + 63.41$ |
| Stx2a + protein G-treated serum               | 6.449                 | 0.9878         | $y = -66.71x + 104.0$ |
| Stx2a + protein G-treated serum + DTT         | 1.042                 | 0.9918         | $y = -59.81x + 51.06$ |
| Stx2a + serum + DTT                           | 1.339                 | 0.9798         | $y = -82.14x + 60.42$ |
| cleaved Stx2a                                 | 3.475                 | 0.9796         | $y = -56.20x + 80.41$ |
| cleaved Stx2a + DTT                           | 0.083                 | 0.9804         | $y = -62.21x - 17.06$ |
| cleaved Stx2a + protein G-treated serum       | 4.389                 | 0.9994         | $y = -55.89x + 85.90$ |
| cleaved Stx2a + protein G-treated serum + DTT | 0.031                 | 0.9944         | $y = -68.49x - 53.00$ |
| cleaved Stx2a + serum + DTT                   | 0.027                 | 0.9902         | $y = -60.66x - 45.13$ |
